# Supplementary material for: Cross-cultural adaption, translation and validation of the Toronto extremity salvage score (TESS) for patients in German-speaking countries
Source: Springer Nature journal article supplement (doi:10.1007/s00508-021-01865-4), 2021-04-27
Supplement: MOESM2 [file 19111928]

**Toronto Extremity Salvage Score (TESS)**Erhobene Daten 

Instruktionen: Das ist das Deckblatt für die Einreichung des (SAQ\*-F) Fragebogens. Diese Seite muss vom medizinischen Personal ausgefüllt werden (Krankenschwester, Datenmanager, Arzt, etc.) Für detaillierte Informationen siehe TESS Fragebogen.

|                                                                                                                                                                                                                                                                                                                                                                                                                                                                                                                                                                                                                                                                                                                                                                                                                                                                                                                                                         |                                                                                                                                                                                                                                                                                                                                                                                                                                                                                                                                                                                                                                                                                                                                                                                                                                                                                                                                                                                                                          |
|---------------------------------------------------------------------------------------------------------------------------------------------------------------------------------------------------------------------------------------------------------------------------------------------------------------------------------------------------------------------------------------------------------------------------------------------------------------------------------------------------------------------------------------------------------------------------------------------------------------------------------------------------------------------------------------------------------------------------------------------------------------------------------------------------------------------------------------------------------------------------------------------------------------------------------------------------------|--------------------------------------------------------------------------------------------------------------------------------------------------------------------------------------------------------------------------------------------------------------------------------------------------------------------------------------------------------------------------------------------------------------------------------------------------------------------------------------------------------------------------------------------------------------------------------------------------------------------------------------------------------------------------------------------------------------------------------------------------------------------------------------------------------------------------------------------------------------------------------------------------------------------------------------------------------------------------------------------------------------------------|
| <p><b>1</b> <input type="checkbox"/> <b>Zeitpunkt</b> (1)</p> <p>1 Ausgangszustand<br/>2 12 Monate nach Beginn der Behandlung<br/>3 18 Monate nach Beginn der Behandlung<br/>4 24 Monate nach Beginn der Behandlung</p> <p><b>2</b> <input type="checkbox"/> <b>Hat der Patient den Fragebogen fertiggestellt?</b> (2)</p> <p>1 Nein (weiter bei Frage 3)<br/>2 Ja</p> <p><b>2A Datum wann der Patient den Fragebogen ausgefüllt hat</b></p> <p>_____ - _____ - _____ (3)</p> <p><b>3</b> <input type="checkbox"/> <b>Grund, warum der Fragebogen nicht ausgefüllt wurde</b> (4)</p> <p>0 Nicht zutreffend, Fragebogen wurde ausgefüllt<br/>1 Patient verweigert wegen Krankheit<br/>2 Patient verweigert aus anderem Grund, Begründung _____<br/>3 Patient konnte nicht kontaktiert werden<br/>4 Institutioneller Fehler<br/>5 Fragebogen nicht in der Landessprache des Patienten verfügbar<br/>6 Anderer Grund, Begründung _____<br/>9 Unbekannt</p> | <p><b>4</b> <input type="checkbox"/> <b>Erhebungsmethode</b> (7)</p> <p>0 Nicht zutreffend (nicht ausgefüllt)<br/>1 Bei der Visite<br/>2 Via E-Mail<br/>3 Telefonisch<br/>4 Unbekannt</p> <p><b>5</b> <input type="checkbox"/> <b>Benötigte der Patient Hilfestellung für das Ausfüllen?</b> (8)</p> <p>0 Nicht zutreffend (nicht ausgefüllt)<br/>1 Nein<br/>2 Ja<br/>3 Unbekannt, wenn Hilfestellung gegeben wurde</p> <p><b>6</b> <input type="checkbox"/> <b>Wer gab die Hilfestellung?</b> (9)</p> <p>0 Nicht zutreffend (nicht ausgefüllt, keine Assistenz)<br/>1 Mitarbeiter<br/>2 Familie<br/>3 Andere, Wer? _____ (10)<br/>9 Unbekannt</p> <p><b>6</b> <input type="checkbox"/> <b>Ausmaß der gegebenen Hilfestellung</b> (11)</p> <p>0 Nicht zutreffend (nicht ausgefüllt, keine Assistenz)<br/>1 Die Fragen wurden vorgelesen<br/>2 Die Fragen wurden erklärt<br/>3 Fragen wurden nach Antwort des Patienten angekreuzt<br/>4 Kombination aus: _____ (12)<br/>5 Andere, welche? _____ (13)<br/>9 Unbekannt</p> |
|---------------------------------------------------------------------------------------------------------------------------------------------------------------------------------------------------------------------------------------------------------------------------------------------------------------------------------------------------------------------------------------------------------------------------------------------------------------------------------------------------------------------------------------------------------------------------------------------------------------------------------------------------------------------------------------------------------------------------------------------------------------------------------------------------------------------------------------------------------------------------------------------------------------------------------------------------------|--------------------------------------------------------------------------------------------------------------------------------------------------------------------------------------------------------------------------------------------------------------------------------------------------------------------------------------------------------------------------------------------------------------------------------------------------------------------------------------------------------------------------------------------------------------------------------------------------------------------------------------------------------------------------------------------------------------------------------------------------------------------------------------------------------------------------------------------------------------------------------------------------------------------------------------------------------------------------------------------------------------------------|

\_\_\_\_\_  
Unterschrift des Ausfüllenden (14)

\_\_\_\_\_  
Datum der Erstellung (15)

## Toronto Extremity Salvage Score (TESS) Administration des Fragebogens

### Allgemeine Richtlinien

Dieser Fragebogen wurde entwickelt zur Funktionsmessung von Patienten mit physikalischen Beeinträchtigungen nach einer extremitätenerhaltenden Operation von muskuloskeletalen Tumoren. Das ist ein selbstständig auszufüllender Fragebogen.

### Punktevergabe

Jede Frage dient als Maß für die Schwierigkeit zur Erfüllung der Aufgabe. Die Gesamtpunktzahl für eine Einheit bedeutet den bestmöglichen Leistungswert (d.h. 5).

Die Skala wurde dahingehend entwickelt, dass die Teilnehmer auch in einer nicht-anwendbaren Kategorie antworten können, wenn sie diese nicht in ihrer täglichen Routine ausüben. Demzufolge wird der Gesamtscore des Fragebogens standardisiert zwischen 0 – 100 berechnet:

$$\frac{\text{Summe der Gesamtpunktzahl} - \# \text{ Items}}{\text{möglicher Punkteintervall}} \times 100\%$$

Summe der Itemscores = Summe der Beeinträchtigungsreaktion  
# Item = beantwortete Items ausgenommen der nicht beantworteten Items (NA)  
möglicher Punkteintervall = (5 x #Items) – (1 x #Items)

### Mail Administration

Die Fragebögen wurden per Post verschickt und obwohl keine formale Prüfung stattgefunden hat, sind die Patienten bereit und in der Lage die Fragebögen auszufüllen und die Werte liegen innerhalb der erwarteten Bereiche.



## BEISPIEL

Gemüse schälen ist:

- 1 \_\_\_ unmöglich
- 2 \_\_\_ extrem schwierig
- 3 \_\_\_ mäßig schwierig
- 4 \_\_\_ ein wenig schwierig
- 5 \_\_\_ überhaupt nicht schwierig

888 \_\_\_ Diese Fragestellung trifft auf mich nicht zu.

Sie sollten die Antwort „unmöglich“ wählen, wenn die Aktivität Bestandteil Ihres üblichen Alltagslebens ist, aber nun aufgrund körperlicher Einschränkung, wie Schwäche, Steifheit und Schmerzen nicht mehr ausführbar ist. Wählen Sie die Antwort „888“ aus, wenn eine der genannten Tätigkeiten in Ihrem Alltagsleben nicht vorkommt.

Kreuzen Sie bitte die am ehesten zutreffende Aussage rückblickend auf den Zeitraum der **vergangenen Woche** an.

Die folgenden Fragen behandeln etwaige Aktivitäten, welche Sie für gewöhnlich in Ihrem täglichen Leben ausüben.

Wählen Sie die Antworten, welche für Sie am besten Ihre Fähigkeit zur Ausführung der Aktivitäten beschreiben. Beziehen Sie derzeitige Einschränkungen aufgrund Ihres Armes, innerhalb der **vergangenen Woche** mit ein.

**1) Eine Hose anziehen ist**

- 1 \_\_\_ unmöglich
- 2 \_\_\_ extrem schwierig
- 3 \_\_\_ mäßig schwierig
- 4 \_\_\_ ein wenig schwierig
- 5 \_\_\_ überhaupt nicht schwierig

888 \_\_\_ Diese Fragestellung trifft auf mich nicht zu.

**2) Schuhe zubinden ist:**

- 1 \_\_\_ unmöglich
- 2 \_\_\_ extrem schwierig
- 3 \_\_\_ mäßig schwierig
- 4 \_\_\_ ein wenig schwierig
- 5 \_\_\_ überhaupt nicht schwierig

888 \_\_\_ Diese Fragestellung trifft auf mich nicht zu.

**3) Socken oder Kniestrümpfe anziehen ist:**

- 1\_\_\_ unmöglich
- 2\_\_\_ extrem schwierig
- 3\_\_\_ mäßig schwierig
- 4\_\_\_ ein wenig schwierig
- 5\_\_\_ überhaupt nicht schwierig

888\_\_\_ Diese Fragestellung trifft auf mich nicht zu.

**4) Duschen ist:**

- 1\_\_\_ unmöglich
- 2\_\_\_ extrem schwierig
- 3\_\_\_ mäßig schwierig
- 4\_\_\_ ein wenig schwierig
- 5\_\_\_ überhaupt nicht schwierig

888\_\_\_ Diese Fragestellung trifft auf mich nicht zu.

**5) Meinen Oberkörper und Arme ankleiden ist:**

- 1\_\_\_ unmöglich
- 2\_\_\_ extrem schwierig
- 3\_\_\_ mäßig schwierig
- 4\_\_\_ ein wenig schwierig
- 5\_\_\_ überhaupt nicht schwierig

888\_\_\_ Diese Fragestellung trifft auf mich nicht zu.

**6) Ein Hemd / eine Bluse zuknöpfen ist:**

- 1\_\_\_ unmöglich
- 2\_\_\_ extrem schwierig
- 3\_\_\_ mäßig schwierig
- 4\_\_\_ ein wenig schwierig
- 5\_\_\_ überhaupt nicht schwierig

888\_\_\_ Diese Fragestellung trifft auf mich nicht zu.

**7) Eine Krawatte oder eine Schleife am Kragen einer Bluse / eines Hemdes zu binden ist:**

- 1 \_\_\_ unmöglich
- 2 \_\_\_ extrem schwierig
- 3 \_\_\_ mäßig schwierig
- 4 \_\_\_ ein wenig schwierig
- 5 \_\_\_ überhaupt nicht schwierig

888 \_\_\_ Diese Fragestellung trifft auf mich nicht zu.

**8) Make-up auflegen oder rasieren ist:**

- 1 \_\_\_ unmöglich
- 2 \_\_\_ extrem schwierig
- 3 \_\_\_ mäßig schwierig
- 4 \_\_\_ ein wenig schwierig
- 5 \_\_\_ überhaupt nicht schwierig

888 \_\_\_ Diese Fragestellung trifft auf mich nicht zu.

**9) Zähneputzen ist:**

- 1 \_\_\_ unmöglich
- 2 \_\_\_ extrem schwierig
- 3 \_\_\_ mäßig schwierig
- 4 \_\_\_ ein wenig schwierig
- 5 \_\_\_ überhaupt nicht schwierig

888 \_\_\_ Diese Fragestellung trifft auf mich nicht zu.

**10) Haare bürsten ist:**

- 1 \_\_\_ unmöglich
- 2 \_\_\_ extrem schwierig
- 3 \_\_\_ mäßig schwierig
- 4 \_\_\_ ein wenig schwierig
- 5 \_\_\_ überhaupt nicht schwierig

888 \_\_\_ Diese Fragestellung trifft auf mich nicht zu.

**11) Leichte Hausarbeiten wie Aufräumen und Staub wischen sind:**

- 1 \_\_\_ unmöglich
- 2 \_\_\_ extrem schwierig
- 3 \_\_\_ mäßig schwierig
- 4 \_\_\_ ein wenig schwierig
- 5 \_\_\_ überhaupt nicht schwierig

888 \_\_\_ Diese Fragestellung trifft auf mich nicht zu.

**12) Gartenarbeit ist:**

- 1 \_\_\_ unmöglich
- 2 \_\_\_ extrem schwierig
- 3 \_\_\_ mäßig schwierig
- 4 \_\_\_ ein wenig schwierig
- 5 \_\_\_ überhaupt nicht schwierig

888 \_\_\_ Diese Fragestellung trifft auf mich nicht zu.

**13) Mahlzeiten zubereiten und servieren ist:**

- 1 \_\_\_ unmöglich
- 2 \_\_\_ extrem schwierig
- 3 \_\_\_ mäßig schwierig
- 4 \_\_\_ ein wenig schwierig
- 5 \_\_\_ überhaupt nicht schwierig

888 \_\_\_ Diese Fragestellung trifft auf mich nicht zu.

**14) Schneiden der Mahlzeiten während dem Essen ist:**

- 1 \_\_\_ unmöglich
- 2 \_\_\_ extrem schwierig
- 3 \_\_\_ mäßig schwierig
- 4 \_\_\_ ein wenig schwierig
- 5 \_\_\_ überhaupt nicht schwierig

888 \_\_\_ Diese Fragestellung trifft auf mich nicht zu.

**15) Aus einem Glas trinken ist:**

- 1 \_\_\_ unmöglich
- 2 \_\_\_ extrem schwierig
- 3 \_\_\_ mäßig schwierig
- 4 \_\_\_ ein wenig schwierig
- 5 \_\_\_ überhaupt nicht schwierig

888 \_\_\_ Diese Fragestellung trifft auf mich nicht zu.

**16) Schwere Hausarbeiten wie Staubsaugen und das Umstellen von Möbel sind:**

- 1 \_\_\_ unmöglich
- 2 \_\_\_ extrem schwierig
- 3 \_\_\_ mäßig schwierig
- 4 \_\_\_ ein wenig schwierig
- 5 \_\_\_ überhaupt nicht schwierig

888 \_\_\_ Diese Fragestellung trifft auf mich nicht zu.

**17) Einkaufen gehen ist:**

- 1 \_\_\_ unmöglich
- 2 \_\_\_ extrem schwierig
- 3 \_\_\_ mäßig schwierig
- 4 \_\_\_ ein wenig schwierig
- 5 \_\_\_ überhaupt nicht schwierig

888 \_\_\_ Diese Fragestellung trifft auf mich nicht zu.

**18) Hantieren mit Münzen und Geldscheinen ist:**

- 1 \_\_\_ unmöglich
- 2 \_\_\_ extrem schwierig
- 3 \_\_\_ mäßig schwierig
- 4 \_\_\_ ein wenig schwierig
- 5 \_\_\_ überhaupt nicht schwierig

888 \_\_\_ Diese Fragestellung trifft auf mich nicht zu.

**19) Eine Einkaufstasche oder Aktenkoffer tragen ist:**

- 1 \_\_\_ unmöglich
- 2 \_\_\_ extrem schwierig
- 3 \_\_\_ mäßig schwierig
- 4 \_\_\_ ein wenig schwierig
- 5 \_\_\_ überhaupt nicht schwierig

888 \_\_\_ Diese Fragestellung trifft auf mich nicht zu.

**20) Eine Schachtel in ein überkopfhohes Regal stellen ist:**

- 1 \_\_\_ unmöglich
- 2 \_\_\_ extrem schwierig
- 3 \_\_\_ mäßig schwierig
- 4 \_\_\_ ein wenig schwierig
- 5 \_\_\_ überhaupt nicht schwierig

888 \_\_\_ Diese Fragestellung trifft auf mich nicht zu.

**21) Einen Schlüssel im Schloss umdrehen ist:**

- 1 \_\_\_ unmöglich
- 2 \_\_\_ extrem schwierig
- 3 \_\_\_ mäßig schwierig
- 4 \_\_\_ ein wenig schwierig
- 5 \_\_\_ überhaupt nicht schwierig

888 \_\_\_ Diese Fragestellung trifft auf mich nicht zu.

**22) Eine Tür aufdrücken oder aufziehen ist:**

- 1 \_\_\_ unmöglich
- 2 \_\_\_ extrem schwierig
- 3 \_\_\_ mäßig schwierig
- 4 \_\_\_ ein wenig schwierig
- 5 \_\_\_ überhaupt nicht schwierig

888 \_\_\_ Diese Fragestellung trifft auf mich nicht zu.

**23) Schreiben ist:**

- 1 \_\_\_ unmöglich
- 2 \_\_\_ extrem schwierig
- 3 \_\_\_ mäßig schwierig
- 4 \_\_\_ ein wenig schwierig
- 5 \_\_\_ überhaupt nicht schwierig

888 \_\_\_ Diese Fragestellung trifft auf mich nicht zu.

**24) Kleine Gegenstände aufheben ist:**

- 1 \_\_\_ unmöglich
- 2 \_\_\_ extrem schwierig
- 3 \_\_\_ mäßig schwierig
- 4 \_\_\_ ein wenig schwierig
- 5 \_\_\_ überhaupt nicht schwierig

888 \_\_\_ Diese Fragestellung trifft auf mich nicht zu.

**25) Meiner Arbeit nachgehen ist: (Haushalt und Beruf)**

- 1 \_\_\_ unmöglich
- 2 \_\_\_ extrem schwierig
- 3 \_\_\_ mäßig schwierig
- 4 \_\_\_ ein wenig schwierig
- 5 \_\_\_ überhaupt nicht schwierig

888 \_\_\_ Diese Fragestellung trifft auf mich nicht zu.

**26) Das Erfüllen meiner üblichen Arbeitsstunden ist: (Haushalt und Beruf)**

- 1 \_\_\_ unmöglich
- 2 \_\_\_ extrem schwierig
- 3 \_\_\_ mäßig schwierig
- 4 \_\_\_ ein wenig schwierig
- 5 \_\_\_ überhaupt nicht schwierig

888 \_\_\_ Diese Fragestellung trifft auf mich nicht zu.

**27) Meinen üblichen Freizeitaktivitäten nachzugehen ist:**

- 1 \_\_\_ unmöglich
- 2 \_\_\_ extrem schwierig
- 3 \_\_\_ mäßig schwierig
- 4 \_\_\_ ein wenig schwierig
- 5 \_\_\_ überhaupt nicht schwierig

888 \_\_\_ Diese Fragestellung trifft auf mich nicht zu.

**28) Sich mit Freunden und der Familie zu treffen ist:**

- 1 \_\_\_ unmöglich
- 2 \_\_\_ extrem schwierig
- 3 \_\_\_ mäßig schwierig
- 4 \_\_\_ ein wenig schwierig
- 5 \_\_\_ überhaupt nicht schwierig

888 \_\_\_ Diese Fragestellung trifft auf mich nicht zu.

**29) Meinen üblichen sportlichen Aktivitäten nachzugehen ist:**

- 1 \_\_\_ unmöglich
- 2 \_\_\_ extrem schwierig
- 3 \_\_\_ mäßig schwierig
- 4 \_\_\_ ein wenig schwierig
- 5 \_\_\_ überhaupt nicht schwierig

888 \_\_\_ Diese Fragestellung trifft auf mich nicht zu.

**1) Meine Fähigkeit alle Aktivitäten des täglichen Lebens während der letzten Woche durchzuführen, schätze ich folgendermaßen ein:**

- 1 \_\_\_ unmöglich
- 2 \_\_\_ extrem schwierig
- 3 \_\_\_ mittelmäßig schwierig
- 4 \_\_\_ wenig schwierig
- 5 \_\_\_ gar nicht schwierig

**2) Ich würde mich selbst folgendermaßen einschätzen:**

- 1 \_\_\_ völlig eingeschränkt
- 2 \_\_\_ stark eingeschränkt
- 3 \_\_\_ mittelmäßig eingeschränkt
- 4 \_\_\_ wenig eingeschränkt
- 5 \_\_\_ gar nicht eingeschränkt

Bitte notieren Sie weiter unten erschwerte Aktivitäten oder etwaige andere Probleme, die Sie auf derzeitige Einschränkungen durch Ihren Arm zurückführen. Notieren Sie bitte jene, die Ihnen erwähnenswert erscheinen und in diesem Fragebogen nicht behandelt wurden.

---

---

---

---

**Vergewissern Sie sich bitte, dass Sie alle Fragen beantwortet haben.**

**Wir möchten uns bei Ihnen für die Teilnahme sehr herzlich bedanken.**

**TESS – Untere Extremität**

Patienten ID#: \_\_\_\_\_ Patienten Initials: \_\_\_\_\_  
(VN,MN,NN)

Geburtsdatum: \_\_\_\_\_ Erstellungsdatum: \_\_\_\_\_  
(Tag/Monat/Jahr) (Tag/Monat/Jahr)

Monate nach Beginn der Behandlung:  Ausgangszeitpunkt  
 12 Monate  
 18 Monate  
 24 Monate

Seite: 1 \_\_\_\_\_ Weichteil  
 2 \_\_\_\_\_ Knochen

Folgende Fragen behandeln körperliche Aktivitäten, die Sie im gewöhnlichen Alltagsleben ausführen. Neben jeder Frage findet sich eine Abstufungsskala der Schwierigkeit zur Ausführung der Aufgabe. Kreuzen Sie bitte die am ehesten zutreffende Aussage rückblickend auf den Zeitraum der **vergangenen Woche** an. Einige der körperlichen Aktivitäten werden für Sie sehr einfach sein, andere werden extrem schwierig oder sich als unmöglich erweisen.

**BEISPIEL:****Fahrradfahren ist:**

- 1 \_\_\_\_\_ unmöglich  
 2 \_\_\_\_\_ extrem schwierig  
 3 \_\_\_\_\_ mäßig schwierig  
 4 \_\_\_\_\_ ein wenig schwierig  
 5 \_\_\_\_\_ überhaupt nicht schwierig

888 \_\_\_\_\_ Diese Fragestellung trifft auf mich nicht zu.

Sie sollten die Antwort „unmöglich“ wählen, wenn die Aktivität Bestandteil Ihres üblichen Alltagslebens ist, aber nun aufgrund körperlicher Einschränkung, wie Schwäche, Steifheit und Schmerzen nicht mehr ausführbar ist. Wählen Sie die Antwort „888“ aus, wenn eine der genannten Tätigkeiten in Ihrem Alltagsleben nicht vorkommt.

Kreuzen Sie bitte die am ehesten zutreffende Aussage rückblickend auf den Zeitraum der **vergangenen Woche** an.

Die folgenden Fragen behandeln etwaige Aktivitäten, welche Sie für gewöhnlich in Ihrem täglichen Leben ausüben.

Wählen Sie die Antworten, welche für Sie am besten Ihre Fähigkeit zur Ausführung der Aktivitäten beschreiben. Beziehen Sie derzeitige Einschränkungen aufgrund Ihres Beines, innerhalb der **vergangenen Woche** mit ein.

**1)Eine Hose anziehen ist:**

- 1 \_\_\_ unmöglich
- 2 \_\_\_ extrem schwierig
- 3 \_\_\_ mäßig schwierig
- 4 \_\_\_ ein wenig schwierig
- 5 \_\_\_ überhaupt nicht schwierig

888 \_\_\_ Diese Fragestellung trifft auf mich nicht zu.

**2)Schuhe zubinden ist:**

- 1 \_\_\_ unmöglich
- 2 \_\_\_ extrem schwierig
- 3 \_\_\_ mäßig schwierig
- 4 \_\_\_ ein wenig schwierig
- 5 \_\_\_ überhaupt nicht schwierig

888 \_\_\_ Diese Fragestellung trifft auf mich nicht zu.

**3)Socken oder Kniestrümpfe anziehen ist:**

- 1 \_\_\_ unmöglich
- 2 \_\_\_ extrem schwierig
- 3 \_\_\_ mäßig schwierig
- 4 \_\_\_ ein wenig schwierig
- 5 \_\_\_ überhaupt nicht schwierig

888 \_\_\_ Diese Fragestellung trifft auf mich nicht zu.

**4) Duschen ist:**

- 1 \_\_\_ unmöglich
- 2 \_\_\_ extrem schwierig
- 3 \_\_\_ mäßig schwierig
- 4 \_\_\_ ein wenig schwierig
- 5 \_\_\_ überhaupt nicht schwierig

888 \_\_\_ Diese Fragestellung trifft auf mich nicht zu.

**5) Leichte Hausarbeit, wie aufräumen oder Staub wischen ist:**

- 1 \_\_\_ unmöglich
- 2 \_\_\_ extrem schwierig
- 3 \_\_\_ mäßig schwierig
- 4 \_\_\_ ein wenig schwierig
- 5 \_\_\_ überhaupt nicht schwierig

888 \_\_\_ Diese Fragestellung trifft auf mich nicht zu.

**6) Gartenarbeit ist:**

- 1 \_\_\_ unmöglich
- 2 \_\_\_ extrem schwierig
- 3 \_\_\_ mäßig schwierig
- 4 \_\_\_ ein wenig schwierig
- 5 \_\_\_ überhaupt nicht schwierig

888 \_\_\_ Diese Fragestellung trifft auf mich nicht zu.

**7) Mahlzeiten zubereiten und servieren ist:**

- 1 \_\_\_ unmöglich
- 2 \_\_\_ extrem schwierig
- 3 \_\_\_ mäßig schwierig
- 4 \_\_\_ ein wenig schwierig
- 5 \_\_\_ überhaupt nicht schwierig

888 \_\_\_ Diese Fragestellung trifft auf mich nicht zu.

**8) Einkaufen gehen ist:**

- 1 \_\_\_ unmöglich
- 2 \_\_\_ extrem schwierig
- 3 \_\_\_ mäßig schwierig
- 4 \_\_\_ ein wenig schwierig
- 5 \_\_\_ überhaupt nicht schwierig

888 \_\_\_ Diese Fragestellung trifft auf mich nicht zu.

**9) Schwere Hausarbeit, wie staubsaugen oder Möbel verrücken, ist:**

- 1 \_\_\_ unmöglich
- 2 \_\_\_ extrem schwierig
- 3 \_\_\_ mäßig schwierig
- 4 \_\_\_ ein wenig schwierig
- 5 \_\_\_ überhaupt nicht schwierig

888 \_\_\_ Diese Fragestellung trifft auf mich nicht zu.

**10) In die Badewanne setzen und aus der Badewanne aufstehen ist:**

- 1 \_\_\_ unmöglich
- 2 \_\_\_ extrem schwierig
- 3 \_\_\_ mäßig schwierig
- 4 \_\_\_ ein wenig schwierig
- 5 \_\_\_ überhaupt nicht schwierig

888 \_\_\_ Diese Fragestellung trifft auf mich nicht zu.

**11) Ins Bett legen und aus dem Bett aufstehen ist:**

- 1 \_\_\_ unmöglich
- 2 \_\_\_ extrem schwierig
- 3 \_\_\_ mäßig schwierig
- 4 \_\_\_ ein wenig schwierig
- 5 \_\_\_ überhaupt nicht schwierig

888 \_\_\_ Diese Fragestellung trifft auf mich nicht zu.

**12) Von einem Stuhl aufstehen ist:**

- 1 \_\_\_ unmöglich
- 2 \_\_\_ extrem schwierig
- 3 \_\_\_ mäßig schwierig
- 4 \_\_\_ ein wenig schwierig
- 5 \_\_\_ überhaupt nicht schwierig

888 \_\_\_ Diese Fragestellung trifft auf mich nicht zu.

**13) Knien ist:**

- 1 \_\_\_ unmöglich
- 2 \_\_\_ extrem schwierig
- 3 \_\_\_ mäßig schwierig
- 4 \_\_\_ ein wenig schwierig
- 5 \_\_\_ überhaupt nicht schwierig

888 \_\_\_ Diese Fragestellung trifft auf mich nicht zu.

**14) Sich bücken, um etwas vom Boden aufzuheben ist:**

- 1 \_\_\_ unmöglich
- 2 \_\_\_ extrem schwierig
- 3 \_\_\_ mäßig schwierig
- 4 \_\_\_ ein wenig schwierig
- 5 \_\_\_ überhaupt nicht schwierig

888 \_\_\_ Diese Fragestellung trifft auf mich nicht zu.

**15) Treppensteigen ist:**

- 1 \_\_\_ unmöglich
- 2 \_\_\_ extrem schwierig
- 3 \_\_\_ mäßig schwierig
- 4 \_\_\_ ein wenig schwierig
- 5 \_\_\_ überhaupt nicht schwierig

888 \_\_\_ Diese Fragestellung trifft auf mich nicht zu.

**16) Treppen hinuntergehen ist:**

- 1 \_\_\_ unmöglich
- 2 \_\_\_ extrem schwierig
- 3 \_\_\_ mäßig schwierig
- 4 \_\_\_ ein wenig schwierig
- 5 \_\_\_ überhaupt nicht schwierig

888 \_\_\_ Diese Fragestellung trifft auf mich nicht zu.

**17) Autofahren ist:**

- 1 \_\_\_ unmöglich
- 2 \_\_\_ extrem schwierig
- 3 \_\_\_ mäßig schwierig
- 4 \_\_\_ ein wenig schwierig
- 5 \_\_\_ überhaupt nicht schwierig

888 \_\_\_ Diese Fragestellung trifft auf mich nicht zu.

**18) Im Haus umhergehen ist:**

- 1 \_\_\_ unmöglich
- 2 \_\_\_ extrem schwierig
- 3 \_\_\_ mäßig schwierig
- 4 \_\_\_ ein wenig schwierig
- 5 \_\_\_ überhaupt nicht schwierig

888 \_\_\_ Diese Fragestellung trifft auf mich nicht zu.

**19) Außerhalb des Hauses umhergehen ist:**

- 1 \_\_\_ unmöglich
- 2 \_\_\_ extrem schwierig
- 3 \_\_\_ mäßig schwierig
- 4 \_\_\_ ein wenig schwierig
- 5 \_\_\_ überhaupt nicht schwierig

888 \_\_\_ Diese Fragestellung trifft auf mich nicht zu.

**20) Sitzen ist:**

- 1 \_\_\_ unmöglich
- 2 \_\_\_ extrem schwierig
- 3 \_\_\_ mäßig schwierig
- 4 \_\_\_ ein wenig schwierig
- 5 \_\_\_ überhaupt nicht schwierig

888 \_\_\_ Diese Fragestellung trifft auf mich nicht zu.

**21) Eine Rampe hinauf- oder hinuntergehen ist:**

- 1 \_\_\_ unmöglich
- 2 \_\_\_ extrem schwierig
- 3 \_\_\_ mäßig schwierig
- 4 \_\_\_ ein wenig schwierig
- 5 \_\_\_ überhaupt nicht schwierig

888 \_\_\_ Diese Fragestellung trifft auf mich nicht zu.

**22) Aufrecht stehen ist:**

- 1 \_\_\_ unmöglich
- 2 \_\_\_ extrem schwierig
- 3 \_\_\_ mäßig schwierig
- 4 \_\_\_ ein wenig schwierig
- 5 \_\_\_ überhaupt nicht schwierig

888 \_\_\_ Diese Fragestellung trifft auf mich nicht zu.

**23) Vom Knien aufstehen ist:**

- 1 \_\_\_ unmöglich
- 2 \_\_\_ extrem schwierig
- 3 \_\_\_ mäßig schwierig
- 4 \_\_\_ ein wenig schwierig
- 5 \_\_\_ überhaupt nicht schwierig

888 \_\_\_ Diese Fragestellung trifft auf mich nicht zu.

**24) In bzw. aus einem Auto ein- oder aussteigen ist:**

- 1 \_\_\_ unmöglich
- 2 \_\_\_ extrem schwierig
- 3 \_\_\_ mäßig schwierig
- 4 \_\_\_ ein wenig schwierig
- 5 \_\_\_ überhaupt nicht schwierig

888 \_\_\_ Diese Fragestellung trifft auf mich nicht zu.

**25) Sex haben ist:**

- 1 \_\_\_ unmöglich
- 2 \_\_\_ extrem schwierig
- 3 \_\_\_ mäßig schwierig
- 4 \_\_\_ ein wenig schwierig
- 5 \_\_\_ überhaupt nicht schwierig

888 \_\_\_ Diese Fragestellung trifft auf mich nicht zu.

**26) Meiner Arbeit nachgehen ist: (Haushalt und Beruf)**

- 1 \_\_\_ unmöglich
- 2 \_\_\_ extrem schwierig
- 3 \_\_\_ mäßig schwierig
- 4 \_\_\_ ein wenig schwierig
- 5 \_\_\_ überhaupt nicht schwierig

888 \_\_\_ Diese Fragestellung trifft auf mich nicht zu.

**27) Das Erfüllen meiner üblichen Arbeitsstunden ist: (Haushalt und Beruf)**

- 1 \_\_\_ unmöglich
- 2 \_\_\_ extrem schwierig
- 3 \_\_\_ mäßig schwierig
- 4 \_\_\_ ein wenig schwierig
- 5 \_\_\_ überhaupt nicht schwierig

888 \_\_\_ Diese Fragestellung trifft auf mich nicht zu.

**28) Meinen üblichen Freizeitaktivitäten nachzugehen ist:**

- 1 \_\_\_ unmöglich
- 2 \_\_\_ extrem schwierig
- 3 \_\_\_ mäßig schwierig
- 4 \_\_\_ ein wenig schwierig
- 5 \_\_\_ überhaupt nicht schwierig

888 \_\_\_ Diese Fragestellung trifft auf mich nicht zu.

**29) Sich mit Freunden und der Familie zu treffen ist:**

- 1 \_\_\_ unmöglich
- 2 \_\_\_ extrem schwierig
- 3 \_\_\_ mäßig schwierig
- 4 \_\_\_ ein wenig schwierig
- 5 \_\_\_ überhaupt nicht schwierig

888 \_\_\_ Diese Fragestellung trifft auf mich nicht zu.

**30) Meinen üblichen sportlichen Aktivitäten nachzugehen ist:**

- 1 \_\_\_ unmöglich
- 2 \_\_\_ extrem schwierig
- 3 \_\_\_ mäßig schwierig
- 4 \_\_\_ ein wenig schwierig
- 5 \_\_\_ überhaupt nicht schwierig

888 \_\_\_ Diese Fragestellung trifft auf mich nicht zu.

**1) Meine Fähigkeit alle Aktivitäten des täglichen Lebens während der letzten Woche durchzuführen, schätze ich folgendermaßen ein:**

- 1 \_\_\_ unmöglich
- 2 \_\_\_ extrem schwierig
- 3 \_\_\_ mittelmäßig schwierig
- 4 \_\_\_ wenig schwierig
- 5 \_\_\_ gar nicht schwierig

**2) Ich würde mich selbst folgendermaßen einschätzen:**

- 1 \_\_\_ völlig eingeschränkt
- 2 \_\_\_ stark eingeschränkt
- 3 \_\_\_ mittelmäßig eingeschränkt
- 4 \_\_\_ wenig eingeschränkt
- 5 \_\_\_ gar nicht eingeschränkt

Bitte kommentieren Sie untenstehend jegliche Aktivitäten, welche Sie schwierig fanden, oder etwaige andere Probleme die Sie mit Ihrem Bein hatten oder wichtig finden zu berichten, was nicht im Fragebogen vorkam.

---

---

---

**Bitte kontrollieren Sie den Fragebogen, ob Sie auch alle Fragen beantwortet haben.**

**Danke, dass Sie sich Zeit genommen haben und die Fragen beantwortet haben.**
